1 **Humans trade-off energetic cost with fatigue avoidance while**  
2 **walking**

3 Kirsty A. McDonald<sup>1,2,3,\*</sup>, Joseph P. Cusumano<sup>4</sup>, Andrew Hieronymi<sup>5</sup>, Jonas Rubenson<sup>2,3,6</sup>

4 <sup>1</sup>Department of Exercise Physiology, School of Health Sciences, University of New South Wales,  
5 Sydney, New South Wales, Australia, 2052

6 <sup>2</sup>School of Human Sciences, The University of Western Australia, Crawley, Perth, Western  
7 Australia, Australia, 6009

8 <sup>3</sup>Biomechanics Laboratory, Department of Kinesiology, The Pennsylvania State University,  
9 University Park, Pennsylvania, United States of America, 16802

10 <sup>4</sup>Department of Engineering Science and Mechanics, The Pennsylvania State University, University  
11 Park, Pennsylvania, United States of America, 16802

12 <sup>5</sup>School of Visual Arts, The Pennsylvania State University, University Park, Pennsylvania, United  
13 States of America, 16802

14 <sup>6</sup>Integrative and Biomedical Physiology, The Huck Institutes of the Life Sciences, The Pennsylvania  
15 State University, University Park, Pennsylvania, United States of America, 16802

16 \*Kirsty A. McDonald

17 **Email:** [kirsty.mcdonald@unsw.edu.au](mailto:kirsty.mcdonald@unsw.edu.au)

18 **Abstract**

19 Metabolic cost minimization is widely regarded as the principal optimality criterion that governs  
20 walking. Minimizing muscle activation has, nevertheless, outperformed energy optimization in  
21 simulating human gait and predicting certain gait behaviors. The highly coupled nature of metabolic  
22 and muscle activation costs makes it difficult to empirically discern the interrelationship between  
23 these objectives. We implemented a unique experimental design that pits metabolic cost against  
24 muscle activation costs estimated from electromyography of seven lower limb muscles. Healthy  
25 adults ( $N=10$ ) selected between walking on a treadmill incline versus walking in a crouched posture  
26 (that disproportionately affected activation cost), forcing a choice between minimizing metabolic  
27 cost or activation cost. When experiencing these *Competing-Cost-Pairs*, participants systematically  
28 protected their activation cost at the expense of high metabolic power ( $\bar{C}_{met,p}$ ; 19% penalty,  
29  $p<0.05$ ). This held true when activation cost was expressed as the sum of the muscle activations  
30 squared ( $\bar{C}_{a^2}$ ; 66% saving,  $p<0.05$ ) and as the maximal activation across muscles ( $\bar{C}_{a,max}$ ; 44%  
31 saving,  $p<0.05$ ), both of which penalize overburdening any individual muscle and thus indicate  
32 fatigue avoidance. Activation cost, expressed as the sum of muscle volume-normalized activation  
33 ( $\bar{C}_{a,vol}$ ), more closely models energy use and was also protected by the participants' decision (23%  
34 saving,  $p<0.05$ ) demonstrating that activation was, at best, an inaccurate proxy signal for metabolic  
35 energy. Energy minimization was only observed when there was no adverse effect on muscle  
36 activation. By decoupling metabolic and activation costs, we provide the first empirical evidence of  
37 humans embracing non-energetic optimality in favor of a clearly defined alternate neuromuscular  
38 objective.

## 39 Introduction

40 Humans often move in ways that save metabolic energy. For example, preferred walking speed  
41 (1–5), step frequency (6–12), step width (13) and arm swing (14,15) are classic examples known  
42 to minimize the metabolic cost of locomotion. More recently, it has been demonstrated that humans  
43 continue to exhibit energy-favoring behaviors, even after normal gait mechanics are disrupted  
44 (8,16,17). Given the consistency of these observations in human locomotion, and the selective  
45 advantage that they purportedly bestow, it is argued that whole-body energy minimization is a  
46 central factor dictating human gait behavior and its evolution (18,19).

47 However, whether metabolic cost minimization is itself the principal, overriding, optimality criterion  
48 during gait remains a matter of debate. For example, it has been proposed that other factors, such  
49 as fatigue avoidance, may be prioritized in the control scheme of locomotion (20–22), with low  
50 metabolic cost arising as a byproduct. Similarly, others suggest that economical human gait arises  
51 not from minimization of metabolic cost alone, but rather via the control of metabolic energy in  
52 conjunction with several additional optimality criteria (23,24).

53 Of the possible non-energetic optimality criteria, a compelling argument can be made for a muscle  
54 activation-based control signal in human locomotion. Several groups have developed successful  
55 simulations of human locomotion based on minimizing total muscle activation. This approach has  
56 proven particularly powerful in predicting realistic locomotor mechanics and energetics, often  
57 outperforming simulations based on minimizing total energy cost alone (21,22,25,26). For example,  
58 Miller et al. (21) discovered that more realistic gait biomechanics and whole-body metabolic cost  
59 could be predicted by minimizing muscle activation compared to metabolic cost itself, despite the  
60 longstanding view that humans consistently prioritize energy optimizing gaits (5,11). Likewise,  
61 Falisse et al. (23), and more recently, Veerkamp et al. (24), demonstrated that the inclusion of  
62 muscle activation in a multi-objective performance criterion is essential for generating the most  
63 physiologically realistic simulations of human gait. There also exists experimental data that point to  
64 muscle activation as a control signal in human locomotion. For example, the metabolic cost of  
65 walking on inclines of up to 10% can be predicted using muscle activation data (27). Preferred  
66 stride frequencies (28,29) and the walk-run transition (30–32)—a fundamental locomotor behavior  
67 that is not always tracked by whole-body energy cost (20)—can also be predicted by a muscle  
68 activation minimizing criterion. Similarly, self-selected cadence in cycling has been found to  
69 coincide with low muscle activity (33), more so than with minimization of metabolic energy  
70 expenditure (34,35). Together, these simulation and experimental data indicate that muscle  
71 activation may indeed be among the primary optimality criteria governing human gait.

72 On closer examination of the aforementioned studies, the activation cost functions that have been  
73 most successful in predicting gait mechanics and energetics (often better than energy optimization)  
74 penalize high activations in any given muscle. These cost functions minimize the sum of individual  
75 muscle activations ( $A$ ) raised to an integer power (e.g.,  $A^2$ ,  $A^3$  etc.), where the activation of a muscle  
76 is defined as the fraction (between 0 and 1) of the total muscle fibers activated (21,22). Other  
77 successful simulations of muscle control have used a similar, but more extreme formulation,  
78 whereby the maximum activation of any single muscle is minimized (the min-max model; (36)). As  
79 above, the resulting recruitment pattern is one that favors a uniform distribution of activations across  
80 muscles as opposed to high activations among a select few muscles—even in cases where the  
81 latter results in lower total energy consumption (22,26). This avoidance of high muscle activation  
82 that arises from non-uniform muscle recruitment has been regarded as a fatigue-minimizing  
83 (endurance maximizing) strategy (22,37,38). Thus, the nervous system may prioritize a ‘division of  
84 labor’ across muscles that minimizes muscle fatigue, as opposed to a strict ‘economy of labor’. In  
85 this scenario, economical gait may arise not as the principal optimization criterion, but rather  
86 secondary to a control paradigm favoring even muscle recruitment (22).

87 Establishing the mechanism(s) driving locomotor behavior is key to understanding the control of  
88 human gait and the resulting energetics. Previous investigations have largely been limited to  
89 simulation studies that assign objective functions (optimality criteria) *a priori* and subsequently

90 assess their efficacy based on their ability to reproduce a high number of human gait features. To  
91 the best of our knowledge, no study has empirically addressed whether whole-body energy use or  
92 fatigue-like muscle activation costs (e.g., sum of  $A^2$ ; (22)) are prioritized during locomotion.  
93 Therefore, we designed an experiment to pit fatigue-like muscle activation costs against the total  
94 metabolic cost during walking by disrupting the distribution of activation across the lower limb  
95 muscles. Importantly, in this design, moving with low energy expenditure while simultaneously  
96 favoring a low muscle activation cost (i.e., low muscle fatigue) was unfeasible, therefore providing  
97 an opportunity to empirically test whether one criterion was favored over the other.

## 98 **Materials and methods**

### 99 **Participants**

100 Ten healthy adults (5F, 5M; age  $31.1 \pm 7.2$  years; mass  $69.6 \pm 11.1$  kg; height  $1.70 \pm 0.07$  m;  
101 mean  $\pm$  SD) participated in this study after providing informed consent. The study was approved by  
102 the Institutional Review Board at The Pennsylvania State University and received reciprocal  
103 approval by the Human Research Ethics Committee at the University of Western Australia.  
104 Volunteers were required to be free from medical conditions that could make moderate-intensity  
105 exercise unsafe (e.g., heart, respiratory and/or musculoskeletal conditions).

### 106 **Experimental design overview**

107 The primary objective of our experimental design was to create two competing conditions  
108 (Competing-Cost-Pairs) that required the participants to select between either a low whole-body  
109 metabolic cost or a low activation cost (see below for cost functions). Importantly, in selecting  
110 between the Competing-Cost-Pairs, the metabolic cost and activation cost could not be  
111 simultaneously reduced. Through pilot testing, two locomotor conditions were established to meet  
112 this experimental design goal. The first condition, crouch walking on a level treadmill, was  
113 determined to elicit a moderate metabolic cost and a high activation cost due to the uneven  
114 distribution of muscle recruitment across lower limb muscles. The second condition, incline walking,  
115 included five levels of treadmill incline that ranged from 0-24% and that predominantly taxed  
116 metabolic cost. As the incline level was increased, a Competing-Cost-Pair was determined by  
117 identifying the incline level that elicited a metabolic cost exceeding that of crouch walking, while at  
118 the same time having a lower muscle activation cost (see Fig. 1).

119 To establish the Competing-Cost-Pairs, five independent comparison trials were performed in a  
120 random order between flat (i.e., level treadmill) crouch walking and upright walking on one of the  
121 five incline levels (0%, 6%, 12%, 18% or 24%; Fig. 1). For each comparison, participants were  
122 asked to explore both crouch walking and upright walking on the assigned incline for three minutes.  
123 After this time, they selected their preferred state (crouch or upright incline walking), in which they  
124 then walked for an additional five minutes. The steepest incline level that was selected over crouch  
125 walking was referred to as the pre-transition incline. The first incline level for which the crouch  
126 walking was preferred was referred to as the post-transition incline (data were collected at the end  
127 of the five comparison trials for all incline levels that were rejected in favor of crouch walking).

### 128 **Crouch walking**

129 Crouch walking was achieved by having participants walk on a level treadmill (0% incline) while  
130 avoiding contact between their body and a virtual ceiling, with the specific instruction to maintain  
131 their trunk and head in a normal, upright walking posture (i.e., crouched, but not hunched or with  
132 lowered head). A motion sensing device (Xbox Kinect, Microsoft, WA, USA), situated behind the  
133 participant, was programmed to detect the participant's body shape and produce a two-dimensional  
134 body silhouette. This silhouette was displayed on a large screen in front of the treadmill together  
135 with the virtual ceiling projection (Fig. 2). The ceiling height was programmed to equal 93% of the  
136 participant's standing height. This height was established in pilot testing to result in a crouch posture  
137 that elicited the desired increases in our metric of activation cost (see below). During periods of  
138 silhouette-ceiling collision, the outline of the silhouette was filled blue to alert the participant of  
139 contact. The number and duration of collisions was recorded for each trial. The real-time motion-

140 tracking and visual feedback was implemented in a custom program developed with the  
141 openFrameworks open-source C++ toolkit.

142 At the beginning of each experiment, participants were provided a crouch walking familiarization  
143 trial. Participants walked at a set speed of  $1.0 \text{ m s}^{-1}$ , crouching below the virtual ceiling. After three  
144 minutes of crouch walking with unlimited silhouette-ceiling collisions, the participant was informed  
145 that, to end the familiarization session, they must perform one minute of walking with no recorded  
146 collisions.

147 All participants achieved the one-minute benchmark and progressed to the next phase of data  
148 collection, in which their crouch preferred walking speed ( $\text{PWS}_{\text{CW}}$ ;  $\text{m s}^{-1}$ ) was assessed in  
149 accordance with the method outlined by Dingwell and Marin (39). All crouch and incline walking  
150 trials described below were administered at the  $\text{PWS}_{\text{CW}}$  so as not to disadvantage metabolic  
151 energy use in the crouch condition: i.e., it was assumed that preferred walking speed selection  
152 would minimize metabolic cost of transport for the crouch condition (2,40).

### 153 **Comparison trials**

154 Following  $\text{PWS}_{\text{CW}}$  determination, a five-minute trial of crouch walking was recorded (initial crouch).  
155 In a randomized order, five levels of upright incline walking (on treadmill inclines of 0%, 6%, 12%,  
156 18% and 24%) were then pitted against crouch walking, one by one. Each comparison trial (crouch  
157 versus a single incline level) commenced with 30 seconds of crouch walking and 30 seconds of  
158 incline walking (the order of which was reversed for consecutive comparison trials), followed by a  
159 further two minutes where the participant was free to explore both the crouch and incline. During  
160 the two-minute exploratory period, transition between the crouch and incline walking was verbally  
161 requested by the participant and manually initiated by the investigator, taking less than 10 seconds  
162 to implement.

163 At the conclusion of the exploratory period, the participant verbally expressed the condition (crouch  
164 or incline) in which they would prefer to walk for the following five minutes. Their preference was  
165 then imposed for a five-minute period, during which metabolic, surface electromyography (EMG),  
166 and ground reaction force (GRF) data were collected (details below). On discussions with  
167 participants at the conclusion of the experiment, it was confirmed that, together, the one minute  
168 (total) of imposed walking in the two conditions and the two minutes of free exploration was  
169 adequate for all participants to conclusively decide on a preferred condition.

170 Once crouch walking had been compared to the five incline levels, an additional five-minute crouch  
171 walking trial was recollected to account for fatigue/familiarization effects (final crouch). Any  
172 outstanding incline levels for which data was not collected as part of the comparison trials (because  
173 crouch walking was preferred) were then completed at  $\text{PWS}_{\text{CW}}$ , each for five minutes (randomized  
174 order), to provide insight into the participant's motivation for transitioning (rejecting these inclines).  
175 To minimize any persistent muscle fatigue effects, participants commenced each consecutive trial  
176 when they had returned to a baseline (resting) level of exertion. When describing the protocol,  
177 participants were made aware that they may be asked to complete at most 12 walking trials.  
178 However, the nature of the trials following the comparison trials were not revealed to the participants  
179 to ensure it did not influence their prior decisions.

### 180 **Whole-body energetics and electromyography measurements**

181 Breath-by-breath oxygen uptake and carbon dioxide production were sampled using a portable  
182 metabolic system (Cosmed K4b<sup>2</sup>, Rome, Italy). A portable metabolic device was necessary to  
183 facilitate adherence to the required crouching posture and free regulation of body position on the  
184 treadmill. The final minute of data was used to compute a steady-state mass-specific metabolic  
185 power ( $C_{\text{met},P}$ ;  $\text{W kg}^{-1}$ ) for each trial (details below). Surface EMG recordings were made  
186 synchronously from gluteus maximus (Gmax), biceps femoris (BF), rectus femoris (RF), vastus  
187 medialis (VM), medial gastrocnemius (MG), soleus (SOL) and tibialis anterior (TA) of the right leg,  
188 using silver-tipped surface electrodes placed according to SENIAM guidelines (41). Signals were  
189 recorded using a Bortec Octopus AMT-8 system (Calgary, Canada). Twenty strides of EMG data  
190 were collected at 2000 Hz. Ground reaction forces from the custom-built instrumented treadmill

191 were also obtained (again sampled at 2000 Hz) to determine foot contacts and were later used to  
192 crop the EMG data into strides during data processing. Metabolic, EMG and GRF data were  
193 collected during the initial and final crouch trials, all comparison trials where the incline was  
194 selected, and any outstanding incline trials (thus, there were seven total recording trials).

### 195 **Data processing**

196 Data processing was performed in MATLAB 2018a (MathWorks, Natick, USA) using in-built  
197 functions and custom scripts.

#### 198 *Metabolic power* ( $C_{met,P}$ )

199 The rate of oxygen uptake ( $\dot{V}O_2$ ; L s<sup>-1</sup>) and carbon dioxide production ( $\dot{V}CO_2$ ; L s<sup>-1</sup>) were averaged  
200 from the final minute of each trial and the following stoichiometric equation was applied to determine  
201 metabolic power (42,43):

$$202 \quad C_{met,P} = \frac{(16.89(\dot{V}O_2) + 4.82(\dot{V}CO_2)) 1000}{M}$$

203 Where  $M$  represents participant body mass. Because speed was constant across trial, we did not  
204 convert to a cost per distance traveled.

#### 205 *Muscle activation*

206 Two participants' activation data were eliminated from further analyses due to notable and  
207 persistent signal artefact in one of their processed electromyograms. For the remaining participants  
208 ( $N=8$ ), the raw EMG data were DC offset, band-pass filtered (20-350 Hz) to remove any movement  
209 artefact and high frequency noise, and full-wave rectified. A linear envelope was applied to the  
210 rectified data using a low-pass filter with 6 Hz cut-off frequency ( $EMG_{env}$ ). All data filtering utilized  
211 fourth-order Butterworth underdamped filters (44). For each of the seven trials for which data was  
212 collected, five strides ( $j = 1, 2, \dots, 5$ ) of  $EMG_{env}$  data per muscle ( $i = 1, 2, \dots, 7$ ) were individually  
213 integrated to produce scalar muscle activation values for each muscle, for each stride ( $a_{ij}$ ), as  
214 below:

$$215 \quad a_{ij} \triangleq \int_0^{tf} (EMG_{env})_{ij} dt$$

216 where  $(EMG_{env})_{ij}$  represents the processed linear envelop of the  $i^{th}$  muscle for the  $j^{th}$  stride, 0 is  
217 the time at the initial contact of the right foot and  $tf$  is the time at the consecutive contact of the  
218 same (ipsilateral) foot determined from force plate thresholds (2% of peak signal).

219 To take into consideration fluctuations in the activation integral ( $a_{ij}$ ) that can occur due to changes  
220 in stride time ( $T_j$ ), each stride's muscle activation values were expressed as a rate  $\left(\frac{a_{ij}}{T_j}\right)$ . A  
221 normalized (unitless) activation ( $A_{ij}$ ) was computed for each muscle, for each stride by normalizing  
222 by the average value obtained from the five strides of the 0% incline trial:

$$223 \quad A_{ij} \triangleq \frac{a_{ij}}{T_j} / \left( \frac{1}{5} \sum_{j=1}^5 \frac{a^0_{ij}}{T^0_j} \right)$$

224 where  $a^0$  and  $T^0$  are the activation integral and stride time of the 0% incline trial, respectively.

#### 225 *Activation cost functions*

226 We used what have previously been classified as 'fatigue-like' activation cost functions that  
227 penalized large, fatigue-inducing, muscle activations irrespective of the size of the muscle (21,22).  
228 Our cost functions are based on those previously adopted, minimizing a) the sum of individual

229 muscle activations raised to an integer power ( $p > 1$ ) (22) or b) the individual maximal muscle  
230 activation across all muscles ( $p \rightarrow \infty$ ) (Rasmussen et al., 2001).

231 **a) Sum of activations squared ( $\bar{C}_{a^2}$ );** For each trial, a total muscle activation cost was computed  
232 as the sum of the seven muscles' normalized activations ( $A_{ij}$ ) squared. This value was then  
233 averaged across five strides:

234

$$\bar{C}_{a^2} \triangleq \frac{1}{5} \sum_{j=1}^5 \sum_{i=1}^7 (A_{ij}^2)$$

235 **b) Maximal muscle activation ( $\bar{C}_{a,max}$ );** At the extreme end of fatigue-like activation cost  
236 functions, i.e., the integer power limit ( $p \rightarrow \infty$ ), the cost function depends only on the maximally  
237 activated muscle (22). Thus, for each trial, the maximum activation cost was computed as the  
238 maximum value ( $max_i$ ) from the seven muscles' normalized activation ( $A_{ij}$ ). This value was then  
239 averaged across five strides:

240

$$\bar{C}_{a,max} \triangleq \frac{1}{5} \sum_{j=1}^5 [max_i(A_{ij})]$$

241 By adopting these two cost functions we capture a range of fatigue-like activation cost formulations,  
242 with the latter most strongly penalizing high activation in individual muscles. Both activation costs  
243 represent fatigue through a combined effect of the amount of fibers active within the muscles ( $a_{ij}$ ),  
244 as well as the rate at which they are used during continuous walking ( $\frac{1}{T_j}$ ), similar to the fatigue  
245 activation cost function in Miller et al. (21).

246 **c) Sum of the volume-weighted activations ( $\bar{C}_{a,vol}$ );** In addition to the two aforementioned  
247 fatigue-like activation costs, we also included an 'effort-like' activation cost (22). This cost function  
248 does not penalize an uneven distribution of muscle activation. Rather, it takes into consideration  
249 active muscle volume, a key determinant of muscle energy expenditure (45,46), by weighting the  
250 activations by muscle size. Therefore, unlike the fatigue-like functions, this cost is more sensitive  
251 to activation of large muscles (22). This cost was included to assess the possibility that muscle  
252 activation serves as a proxy for metabolic energy expenditure (47).

253 The normalized activation rate ( $A_{ij}$ ) for each muscle was weighted ( $w_i$ ) according to the muscle  
254 volumes documented in the supplementary material of Handsfield et al. (48). These weightings  
255 were 0.33, 0.08, 0.10, 0.17, 0.10, 0.17 and 0.05 for Gmax, BF, RF, VM, MG, SOL, and TA,  
256 respectively, and represent each muscle's volume as a proportion of the sum of all seven muscles.  
257 The seven volume-weighted normalized activation rates were then summed, and this value was  
258 averaged across five strides:

259

$$\bar{C}_{a,vol} \triangleq \frac{1}{5} \sum_{j=1}^5 \sum_{i=1}^7 w_i (A_{ij})$$

## 260 **Data analysis**

261 For each metric described above, five values were initially analyzed; mean crouch (the mean value  
262 of the initial crouch and final crouch trials), initial crouch, final crouch, pre-transition incline (the  
263 steepest incline level which was selected over crouch walking) and post-transition incline (the  
264 lowest incline level that was rejected in favor of crouch walking). Whether the mean, initial or final  
265 crouch data were compared to the pre- and post- transition inclines had no bearing on the  
266 interpretation of the results discussed herein. Thus, the mean crouch data is represented by all  
267 future references to the crouch walking data.

## 268 **Competing-Cost-Pairs**

269 Each participant's mean crouch walking data was compared to the pre-transition incline to  
270 determine whether Competing-Cost-Pairs had been established (i.e., the two trials were designed  
271 to provide mutually exclusive  $C_{met,P}$  and  $\bar{C}_{a^2}$  advantages). We accepted a Competing-Cost-Pair  
272 when  $C_{met,P}$  decreased between the pre-transition incline and crouch walking trials, and  $\bar{C}_{a^2}$   
273 increased. The  $C_{met,P}$  and  $\bar{C}_{a^2}$  advantages were assessed because our aim was to compare  
274 metabolic and fatigue-like muscle activation costs, and  $\bar{C}_{a^2}$  represents the less extreme (least  
275 biased) of our fatigue-like cost functions. A secondary analysis was then performed to determine  
276 whether Competing-Cost-Pairs were also present between  $C_{met,P}$  and  $\bar{C}_{a,max}$ , and  $C_{met,P}$  and  $\bar{C}_{a,vol}$ .

## 277 **Statistical analyses**

278 Summary statistics (group mean $\pm$ SD) were computed for crouch walking performance variables  
279 (number and duration of silhouette-ceiling collisions), and for key cost metrics ( $C_{met,P}$ ,  $\bar{C}_{a^2}$ ,  $\bar{C}_{a,max}$   
280 and  $\bar{C}_{a,vol}$ ) during the crouch and incline walking trials. Normality was assessed using the Shapiro-  
281 Wilk test. One-way repeated measures analysis of variance (ANOVA) tests were used to confirm  
282 main effects of the normally distributed incline data (0, 6, 12, 18, 24% inclines) for  $C_{met,P}$ ,  $\bar{C}_{a^2}$ ,  $\bar{C}_{a,max}$   
283 and  $\bar{C}_{a,vol}$ .

284 For the crouch, pre-transition incline and post-transition incline comparisons, key cost metrics were  
285 each analyzed via a one-way repeated measures ANOVA (normally distributed) or Friedman test  
286 (non-normally distributed). *Post hoc* testing was then administered as paired-samples t-tests  
287 (normally distributed) or Wilcoxon tests (non-normally distributed). Results were compared against  
288 an adjusted alpha level ( $p=0.017$ ; Bonferroni correction). All other analyses employed a standard  
289 0.05 alpha level. In group-level analyses, all available data ( $N=10$  for  $C_{met,P}$  and  $N=8$  for  $\bar{C}_{a^2}$ ,  $\bar{C}_{a,max}$ ,  
290  $\bar{C}_{a,vol}$ ) was used. Paired samples t-tests/Wilcoxon tests analyzed  $C_{met,P}$ ,  $\bar{C}_{a^2}$ ,  $\bar{C}_{a,max}$  and  $\bar{C}_{a,vol}$  in  
291 the sub-sample of participants for whom a Competing-Cost-Pair was successfully established  
292 ( $N=7$ ).

293 To discern whether the use of the initial, final or mean crouch data to represent crouch walking  
294  $C_{met,P}$ ,  $\bar{C}_{a^2}$ ,  $\bar{C}_{a,max}$  and  $\bar{C}_{a,vol}$  would make a difference to our interpretation of results, all relevant  
295 statistical tests (above) were performed three times: i) using the initial crouch data, ii) using the final  
296 crouch data, and iii) using the mean of the initial and final crouch data. No difference in  
297 interpretation was present and so mean crouch data is presented in the Results section below.  
298 Initial and final crouch data comparisons can be found in the Supplementary Material.

299 Any non-normally distributed data is denoted by a caret (^), in the Results section below. SPSS  
300 26.0 (IBM, Chicago, USA) was used to perform all statistical analyses.

## 301 **Results**

### 302 **Gait selections**

303 The current experiment used the selection of one locomotor mode over another—in this case,  
304 walking in a crouch posture versus walking upright at one of five incline levels (0, 6, 12, 18 and  
305 24%)—to reveal underlying prioritization objectives. Thus, in total, five decisions were made by our  
306 participants, i.e., one for each incline level. At low levels of incline (0-12%), all participants ( $N=10$ )  
307 chose the incline over the crouch. At 18% incline, the decision divided our sample; seven  
308 participants continued to select the incline, while three preferred the crouch (Fig. 3A). Those three  
309 participants also chose crouch over the 24% incline. The remaining seven participants all chose  
310 crouch walking over walking on the 24% incline.

311 The task performance of crouch walking was assessed by the total number and duration of  
312 silhouette-ceiling collisions during a single five-minute trial. To determine potential learning effects,  
313 these metrics were recorded at the beginning (initial crouch trial) and end (final crouch trial) of the  
314 data collection session. Total number (start:  $1.2\pm 1.5$ ; end:  $2.3\pm 2.4$ ) and duration (start:  $0.11\pm 0.15$



315 seconds; end:  $0.22 \pm 0.25$  seconds) of collisions did not change significantly ( $p=0.131^{\wedge}$  and  
316  $p=0.075^{\wedge}$ , respectively).

### 317 **Incline and crouch effects on activation and energy costs**

318 All key cost metrics ( $C_{met,P}$ ,  $\bar{C}_{a^2}$ ,  $\bar{C}_{a,max}$  and  $\bar{C}_{a,vol}$ ) increased with increasing incline level (Fig. 3A-  
319 D). This was confirmed by one-way repeated measures ANOVAs, which demonstrated a main  
320 effect of incline for  $C_{met,P}$  ( $p<0.001$ ),  $\bar{C}_{a^2}$  ( $p=0.001$ ),  $\bar{C}_{a,max}$  ( $p<0.001$ ), and  $\bar{C}_{a,vol}$  ( $p<0.001$ ).

321 Crouch walking disrupted the distribution of muscle activation compared to upright walking, such  
322 that select muscles had proportionately higher activation values. In particular, Figure 4 highlights  
323 the increased activation requirements of knee extensor musculature (vastus medialis and rectus  
324 femoris) to facilitate the crouch gait, while the steepest incline gaits are achieved with a more even  
325 distribution of activation.

326 When statistical comparisons were made between the crouch, pre-transition incline and post-  
327 transition incline, the one-way repeated measures ANOVAs/Friedman tests demonstrated a main  
328 effect for  $C_{met,P}$  ( $p<0.001$ ,  $N=10$ ),  $\bar{C}_{a^2}$  ( $p=0.008^{\wedge}$ ;  $N=8$ ),  $\bar{C}_{a,max}$  ( $p=0.001$ ,  $N=8$ ) and  $\bar{C}_{a,vol}$  ( $p=0.003$ ;  
329  $N=8$ ; Fig. 3E-H).

### 330 **Competing-Cost-Pairs**

331 Competing-Cost-Pairs (i.e., two trials providing mutually exclusive  $C_{met,P}$  and  $\bar{C}_{a^2}$  advantages) were  
332 effectively established for seven of the eight participants for whom we acquired a complete set of  
333 EMG data (Table 1; Fig. 5). Competing-Cost-Pairs could also be established for these participants  
334 between  $C_{met,P}$  and  $\bar{C}_{a,max}$ , and  $C_{met,P}$  and  $\bar{C}_{a,vol}$  (Table 1).

335 All seven participants (1-4 and 8-10) chose incline walking over crouch walking and thus selected  
336 low muscle activation at the expense of a high  $C_{met,P}$ . The average  $\bar{C}_{a^2}$  advantage in the Competing-  
337 Cost-Pairs was 66% ( $N=7$ ;  $p=0.018^{\wedge}$ ; range: 31 to 95%) and for  $\bar{C}_{a,max}$  was 44% ( $N=7$ ;  $p=0.003$ ;  
338 range: 15 to 89%; Table 1). The average  $C_{met,P}$  penalty was 19% ( $N=7$ ;  $p=0.002$ ; range: 4% to  
339 31%; Table 1). Participant #6 had a  $C_{met,P}$  that was nearly identical in the crouch and incline  
340 condition (1% difference) and therefore did not present a clear energetic advantage/disadvantage  
341 for gait selection (Table 1). However, Participant #6 achieved the group's largest activation  
342 advantage by selecting the incline condition (210% reduction in  $\bar{C}_{a^2}$ ; 103% reduction in  $\bar{C}_{a,max}$ ). We  
343 also found an advantage in the effort-like activation cost ( $\bar{C}_{a,vol}$ ) when the participants selected  
344 incline walking over crouch walking (Table 1). The average  $\bar{C}_{a,vol}$  advantage in the Competing-  
345 Cost-Pairs was 23% ( $N=7$ ;  $p=0.007$ ; range: 8 to 38%).

346 In addition to the Competing-Cost-Pairs, prioritization objectives can be further assessed from  
347 comparing the group mean  $C_{met,P}$  ( $N=10$ ) and activation costs ( $N=8$ ) of the crouch walking and pre-  
348 and post-transition incline conditions (Fig. 3E-H). Crouch walking incurred a  $C_{met,P}$  of  $7.84 \pm 1.38$  W  
349  $\text{kg}^{-1}$ , which was significantly lower than both the pre- ( $9.46 \pm 0.91$  W  $\text{kg}^{-1}$ ;  $p=0.007$ ) and post-  
350 ( $11.92 \pm 1.31$  W  $\text{kg}^{-1}$ ;  $p=0.005$ ) transition incline levels, with the pre- and post-transition inclines  
351 being significantly different from one another ( $p=0.005$ ; Fig. 3E). In contrast, the  $\bar{C}_{a^2}$  and  $\bar{C}_{a,max}$  for  
352 the crouch walking were significantly greater (84%;  $p=0.012^{\wedge}$  and 52%  $p=0.006$ , respectively) than  
353 the pre-transition incline (Fig. 3F-G). These data show, at a group level, a selection (pre-transition  
354 incline) for lower fatigue-like activation costs at the expense of higher  $C_{met,P}$ . We also found that  
355 the  $\bar{C}_{a^2}$  and  $\bar{C}_{a,max}$  in crouch walking were statistically equivalent to the post-transition incline  
356 ( $p=0.263^{\wedge}$  and  $p=0.214$ , respectively), indicating that the disadvantage in the fatigue-like activation  
357 costs was no longer present when crouch walking was finally selected (crouch walking versus post-  
358 transition incline walking). The effort-like activation metric ( $\bar{C}_{a,vol}$ ) followed a similar pattern (Fig.  
359 3H).  $\bar{C}_{a,vol}$  for crouch walking was significantly greater (27%) than for the pre-transition incline  
360 ( $p=0.003$ ) but not for the post-transition incline ( $p=0.779$ ).

## 361 Discussion

362 Metabolic energy expenditure is widely regarded as a principal determinant of animal locomotor  
363 behavior (5,8,11,49). However, simulation studies of human locomotion suggest muscle activation  
364 may also be a key control parameter (21,22). It is difficult to discern how these criteria are weighted  
365 in the control scheme of locomotion due to their highly coupled nature. The current study utilized  
366 an experimental design that systematically pitted whole-body metabolic cost against muscle  
367 activation costs. In these competing conditions, global energy expenditure was clearly not  
368 prioritized, and our empirical data provide promising support for muscle activity prioritization.

### 369 Energy expenditure is not always the principal objective in human locomotion

370 There are a handful of previous studies in which humans have been observed to expend more  
371 energy than minimally required for both upper and lower limb movement tasks (40,50–56). These  
372 studies suggest that energy minimization may be task-dependent. Perhaps the most well  
373 documented example of non-energetically optimal movement is self-selected cycling cadence (for  
374 a review see Vercruyssen and Brisswalter, 2010). In the context of gait, Yandell and Zelik (56) show  
375 inconsistent prioritization of metabolic cost when participants used their preferred step frequency  
376 during barefoot walking. The authors propose this may be related to the discomfort/pain associated  
377 with an unshod gait (56). Some evidence also suggests humans do not prioritize metabolic cost  
378 minimization when moving in less stable environments, e.g., walking downhill (50) (but this remains  
379 inconclusive (57)) or walking with experimentally imposed asymmetrical leg lengths (40). Humans  
380 have also been observed to perform walking tasks in more effortful ways to eliminate a cognitive  
381 burden (51). Furthermore, there exist several studies of human movement in which immediate,  
382 independent detection and/or acute prioritization of the energetic minima is not evident  
383 (8,40,58,59). The costs driving gait selection in the aforementioned studies remain speculative. The  
384 current study is, in contrast, among the first to explicitly and experimentally demonstrate an  
385 alternative criterion, namely muscle activation, that is prioritized over metabolic cost in the control  
386 scheme of locomotion (at least under the conditions studied here).

387 While it is clear that a  $C_{met,P}$  penalty occurs with the selection of incline walking in the Competing-  
388 Cost-Pairs (and in the pre-transition incline selection more generally; Fig. 3E), we do not suggest  
389 that energy minimization is unimportant to the control of walking, even in less common situations  
390 such as the crouch walking investigated in this study. Indeed, in the final incline condition (post  
391 transition incline), when the  $C_{met,P}$  was the highest and the activation penalty of crouch walking was  
392 reduced or eliminated, participants opted to save energy by selecting crouch walking. Rather, our  
393 study supports the idea that locomotion tasks are regulated in a multi-objective manner that  
394 includes metabolic cost as one important, but not the sole, factor. Taken together, our data across  
395 all conditions suggest that a priority for energy minimization is not an inevitability, but also that as  
396  $C_{met,P}$  increases so might the relative weighting of  $C_{met,P}$  in the control scheme of walking.

### 397 Does a ‘division of muscle labor’ dictate gait control?

398 The non-volume-weighted exponential activation cost function,  $\bar{C}_{a^2}$ , penalizes high (fatiguing)  
399 activations in any single muscle and thus favors an even muscle recruitment strategy (22). The  
400 hypothesis that gait is under a control scheme that minimizes muscle fatigue is not new, but has  
401 been mostly limited to simulation studies (21,22). To the best of our knowledge, the current study  
402 is the first to observe this phenomenon empirically. Our finding that subjects protected their  $\bar{C}_{a^2}$  at  
403 the direct expense of  $C_{met,P}$  was observed both in the individual participants’ Competing-Cost-Pair  
404 trials (Table 1), and also at a group (average) level (Fig. 3E-F).

405 The clear preference for protecting  $\bar{C}_{a^2}$  over energy cost suggests a strong control objective for  
406 maintaining an even muscle recruitment and thus avoiding high, fatiguing, activations that can  
407 cause local muscle exhaustion (22). This is also evident from the more extreme cost function,  
408  $\bar{C}_{a,max}$ , which showed that all participants’ gait selection in the Competing-Cost-Pairs protected  
409 their would-be maximally activated muscle, in line with a *min/max* cost function (36). This further  
410 suggests that the decision to avoid crouch walking may, in fact, have been specifically predicated

411 on not exhausting the primary contributing muscle. Even if highly activated individual muscles  
412 represent a small fraction of the total muscle mass, they can have an important limit on performance  
413 because maximally fatigued muscles set the bottle neck for the endurance of the whole muscle  
414 system (22,60).

415 Further support for activation-driven gait selection comes from our observations of the post-  
416 transition incline gait (i.e., when crouch walking was finally chosen). When crouch walking is  
417 compared to the post-transition incline, we observe a diminished activation advantage. This can be  
418 seen in the group average data, where similar and not statistically different  $\bar{C}_{a^2}$ ,  $\bar{C}_{a,max}$  and  $\bar{C}_{a,vol}$   
419 values were observed between conditions (Fig. 3F-H). This suggests that not only avoiding, but  
420 also selecting crouch walking, involved information from muscle activation. It may be that only when  
421 there is minimal/no activation disadvantage, do participants accept a  $C_{met,P}$  advantage (whether  
422 this was selecting incline over crouch walking, or vice versa, selecting crouch walking over very  
423 steep incline walking). It is also worth pointing out that the high  $\bar{C}_{a^2}$  cost associated with crouch  
424 walking and the steepest incline walking resulted from different muscle recruitment patterns (Fig.  
425 4); high activations in crouch walking are primarily in the vastus medialis (for 6/8 participants), while  
426 in the post-transition incline the muscles that exhibit the high activations are more variable between  
427 subjects.

428 Why should muscle activation be prioritized over energy cost? One answer may be that minimizing  
429 high activations that fatigue a given muscle will likely permit longer movement duration, a  
430 performance criterion that is regarded to be fundamental to the evolution of human bipedalism and  
431 with known ecological relevance (61–63). For instance, to effectively travel long distances in  
432 persistence hunting (regarded as a key feature of human evolution; 62) there is a clear selective  
433 advantage to resist fatigue. Muscle activation is a compelling control signal for sensing a division  
434 of labor among muscles and for avoiding overburdening individual muscles. It is thought that muscle  
435 effort can be readily sensed using central (e.g., via an efference copy) and peripheral (e.g., Group  
436 III and IV muscle afferents) mechanisms (64,65).

#### 437 **Does muscle activation represent a proxy for metabolic energy use?**

438 Notwithstanding the clear acceptance of a  $C_{met,P}$  penalty, could it be possible that the nervous  
439 system was attempting to prioritize total metabolic energy expenditure using a proxy sensor, but  
440 failed? In their recent work, Wong and colleagues (66) concluded that blood-gas receptors are an  
441 unlikely sensor for whole-body locomotor energy expenditure and raised the possibility of a muscle-  
442 level sensor for metabolic cost. Muscle activation is a promising candidate for sensing energy cost  
443 because it is related to the fraction of the muscle that is metabolically active and because activation  
444 itself exacts a substantial metabolic cost in the form of calcium pumping (67–69). If activation serves  
445 as a proxy sensor for energy expenditure, the high volume-weighted activation signal associated  
446 with crouch walking may have ‘tricked’ the nervous system into registering a higher metabolic cost  
447 than that which was actually present. This could occur, in part, due to the inflated activation  
448 contribution of the large (high volume) knee-extensor muscles (Fig. 4). It is worth noting that in  
449 tasks where energy minimization is ubiquitously demonstrated (e.g., steady level walking), muscle  
450 activation and whole-body metabolic costs respond similarly to changing task parameters [e.g.,  
451 step frequency; (11,28)], thus indicating that the muscle activations can, indeed, serve as a proxy  
452 for the energy consumption. This was, however, not the case in the present study. Both  $\bar{C}_{a^2}$ ,  $\bar{C}_{a,max}$ ,  
453 and  $\bar{C}_{a,vol}$  were disassociated from  $C_{met,P}$ , with  $\bar{C}_{a,vol}$  considered a proxy for energy use because it  
454 takes into account active muscle volume (22)—a key determinant of locomotor energy use  
455 (46,69,70).

456 Thus, if activation was used as a proxy for energy, it resulted in a misrepresentation of the relative  
457 energy cost of the crouch versus incline walking conditions. This scenario affects our interpretation  
458 of the energy optimization hypothesis in important ways. First, it would indicate that locomotor  
459 energy sensing is imperfect and may be cruder than previously thought. This implies that high-  
460 precision, rapid, energy sensing and subsequent gait control may be confined to common and  
461 predictable steady-state movements (e.g., steady level ground walking), and, in-turn, that energy

462 optimization may not be particularly robust outside of a narrow range of conditions. Other  
463 experiments that have altered the mechanics of walking in novel ways have found that subjects  
464 often need guidance to discover energy minimizing movements (8,16). This suggests that while  
465 energy minimization may be achieved *eventually*, after sufficient motor learning has taken place, it  
466 may not be prioritized *acutely*. Whether trial-and-error learning can bring about versatile energy  
467 sensing across a myriad of natural conditions for human locomotion remains unclear. This question  
468 will prove key, both for practical reasons (e.g., development of assistive devices), as well as  
469 informing theories into the evolution of human locomotor energetics.

470 Among the most interesting questions that remains is *how* the central nervous system uses muscle-  
471 level signaling to determine the physiological state of the body. For example, does the central  
472 nervous system achieve this by summing the activity of all muscles involved in a given task,  
473 weighted according to their size and tracked over a given distance or time period, and finally  
474 referencing this against a threshold representing global (whole-body) effort or energy use (i.e.,  
475  $\bar{C}_{a,vol}$ )? Or, at the other end of the spectrum, is the control signal based on assessing individual  
476 muscle activation levels against local thresholds unique to each actuator (i.e.,  $\bar{C}_{a,max}$ )? Luu et al.  
477 (71) provide support for the latter strategy. The authors observed that when elbow flexors and knee  
478 extensors were isometrically contracted in unison (at 25, 50 and 100% of their individual maximal  
479 voluntary contraction values), participants' ventilation did not increase to a level that reflected the  
480 cumulative effect of contracting the individual muscle groups. In fact, the ventilatory response did  
481 not change significantly between the single and combined muscle group contractions at any  
482 contraction intensity level (71).

483 We posit a strategy assessing individual muscle activation levels against local thresholds is also a  
484 simpler control strategy for the following reasons. First,  $\bar{C}_{a,max}$  (and also, to a lesser extent,  $\bar{C}_{a^2}$ )  
485 has a computational advantage, limiting the synthesis of information required by the central nervous  
486 system. Individual muscle activation thus presents a promising sensory modality when considering  
487 the credit-assignment problem (66,72), which refers to the direct or indirect nature of the signal(s)  
488 used by the central nervous system to steer gait selection behavior. The internal monitoring of  
489 individual muscle activations to minimize muscle fatigue is an example of a highly direct signal-to-  
490 optimality criterion coupling. Conversely, weighting and summing the individual activations requires  
491 the additional collation of information and is therefore a less direct signaling method for ascribing  
492 locomotor 'cost'. The latter would therefore likely require greater computational effort and time.  
493 Whilst we are not aware of any literature explicitly detailing preferences for computationally  
494 inexpensive control strategies in locomotion, a reduction in cognitive load at the expense of physical  
495 effort was previously observed by Rosenbaum and colleagues (51).

496 We also do not, at present, have an effective way to rank the likelihood that one activation  
497 parameter is a more likely target of control than the other, although we do note that the pre-  
498 transition incline selection saw participants avoid greater  $\bar{C}_{a^2}$  and  $\bar{C}_{a,max}$  penalties than that  
499 associated with  $\bar{C}_{a,vol}$  (84% and 52% versus 27%, respectively;  $N=8$ ). Simulation studies that have  
500 established both mass- or volume-weighted activation and distribution cost functions also support  
501 this perspective, with more realistic gait patterns predicted by a non-volume-weighted or low  
502 volume-weighted muscle activation criterion (21,22). Irrespective of what optimality criterion  
503 activation minimization serves (e.g., a proxy for metabolic cost minimization, improved distribution  
504 of muscle effort, fatigue minimization, etc.), activation itself seems like a reasonable control target  
505 that can utilize relatively simple computational cost strategies.

#### 506 **Alternate explanations for the observed gait selection**

507 Despite the systematic prioritization of a gait with low muscle activation in the Competing-Cost-  
508 Pairs, we cannot rule out alternate hypotheses for the observed gait selection. For example,  
509 discomfort, pain, or other psychological motivators of gait selection behaviors (56,73) could, in  
510 theory, be at the source of the selection of incline walking over crouch walking in the Competing-  
511 Cost-Pairs. Clearly delineating the role of discomfort versus activation *per se* in our observed gait  
512 selections is challenging because the two are related. In crouch walking, muscles with

513 disproportionately high activations are prone to fatigue, which is known to cause discomfort (74).  
514 High muscle activations may also result in high local mechanical stresses that could trigger a pain  
515 response. It is conceivable, therefore, that high muscle activations are the proxy signals used in a  
516 neural computation of a 'comfort' cost. In this regard, the minimization of muscle activation in the  
517 Competing-Cost-Pairs could underlie a higher-level comfort objective.

## 518 **Limitations**

519 The current study captured the activity of seven lower limb muscles that play a key role in human  
520 locomotion. Expanding upon previous empirical studies (47), we also include a weighting factor  
521 when determining the total activation cost. However, incorporating a greater selection of muscles  
522 when computing  $\bar{C}_{a^2}$  and  $\bar{C}_{a,vol}$  would likely provide further insight into prioritization behaviors.

523 While  $C_{met,P}$  is susceptible to changes in both walking speed and step frequency (5,11), the latter  
524 was not imposed for any condition, and the former may have provided a metabolic advantage to  
525 crouch walking because all trials occurred at the preferred speed established for crouch walking.  
526 Yet, irrespective of this, participants still accepted a metabolic penalty through their pre-transition  
527 incline selection. It must be noted that whether one variable was closer to its physiological  
528 maximum than the other (e.g.,  $\dot{V}O_2$ max versus maximal activation) was not measured in the current  
529 study. How close a variable is to its maximum may impact the priority for minimizing that variable.  
530 In this sense it is possible that selectively impairing other (more) important optimality criteria through  
531 energetic minimization will only occur in situations where a very high metabolic cost needs to be  
532 avoided. We acknowledge that the relative importance of activation and  $C_{met,P}$  may also be different  
533 in steady-state level gait, and that it is likely task- and condition-dependent.

534 It is of course possible that other physiological signals exist whose distribution across muscles may  
535 parallel that of activation, for example afferent signals from muscle metabolism receptors (class III  
536 and IV afferents), or proprioceptive signals from muscle spindles and/or Golgi tendon organs.  
537 These may also be involved in the control scheme of walking and deserve further exploration  
538 together with muscle activation.

## 539 **Conclusion**

540 Here, we provide among the first empirical evidence of locomoting humans accepting a metabolic  
541 cost penalty in favor of a predefined, alternative neuromuscular criterion. When choosing between  
542 crouch walking and walking on a series of increasing inclines, our healthy participants protected  
543 both fatigue-like and effort-like activation cost metrics. This observation is concomitant with  
544 activation cost prioritization in the control of steady-state walking (22) and running (21). Further  
545 research is required to determine whether muscle activation is used to estimate global energy or  
546 effort, or if local muscle costs are of greater importance in the control scheme of gait, independent  
547 of their relationship to energy costs *per se*.

## 548 **Acknowledgements**

549 The authors would like to thank Dr. Suzanne Cox and Mr. Brekke Green for data collection  
550 assistance and Drs. Brian Umberger, Ton van den Bogert, Lex Gidley, Jessica Selinger, Max  
551 Donelan, Greg Sawicki, Monica Daley, Young-Hui Chang, and Joseph Hamill for thoughtful  
552 discussions and/or feedback on earlier drafts of this manuscript. The authors also thank Mr. Randall  
553 McCullough for his technical support.

## 554 **References**

- 555 1. Browning RC, Kram R. Energetic cost and preferred speed of walking in obese vs. normal  
556 weight women. *Obesity*. 2005;13(5):891–9.
- 557 2. Browning RC, Baker EA, Herron JA, Kram R. Effects of Obesity and Sex on the Energetic  
558 Cost and Preferred Speed of Walking. *J Appl Physiol*. 2006;100(2):390–8.

- 559 3. Holt KG, Jeng SF, Ratcliffe R, Hamill J. Energetic cost and stability during human walking  
560 at the preferred stride frequency. *J Mot Behav.* 1995;27(2):164–78.
- 561 4. Willis WT, Ganley KJ, Herman RM. Fuel oxidation during human walking. *Metabolism.*  
562 2005;54(6):793–9.
- 563 5. Ralston HJ. Energy-speed relation and optimal speed during level walking. *Eur J Appl*  
564 *Physiol Occup Physiol.* 1958;17(4):277–83.
- 565 6. Minetti AE, Capelli C, Zamparo P, Di Prampero PE, Saibene F. Effects of stride frequency  
566 on mechanical power and energy expenditure of walking. *Med Sci Sport Exerc.*  
567 1995;27(8):1194–202.
- 568 7. Molen NH, Rozendal RH, Boon W. Graphic representation of the relationship between  
569 oxygen-consumption and characteristics of normal gait of the human male. *Proc K Ned*  
570 *Akad van Wet.* 1971;75(4):305–14.
- 571 8. Selinger JC, O'Connor SM, Wong JD, Donelan JM. Humans can continuously optimize  
572 energetic cost during walking. *Curr Biol.* 2015;25(18):2452–6.
- 573 9. Snaterse M, Ton R, Kuo AD, Donelan JM. Distinct fast and slow processes contribute to the  
574 selection of preferred step frequency during human walking. *J Appl Physiol.*  
575 2011;110(6):1682–90.
- 576 10. Umberger BR, Martin PE. Mechanical power and efficiency of level walking with different  
577 stride rates. *J Exp Biol.* 2007;210(18):3255–65.
- 578 11. Zarrugh MY, Todd FN, Ralston HJ. Optimization of energy expenditure during level walking.  
579 *Eur J Appl Physiol Occup Physiol.* 1974;33(4):293–306.
- 580 12. Zarrugh MY, Radcliffe CW. Predicting Metabolic Cost of Level Walking. *Eur J Appl Physiol*  
581 *Occup Physiol.* 1978;38(3):215–23.
- 582 13. Donelan JM, Kram R, Kuo AD. Mechanical and metabolic determinants of the preferred step  
583 width in human walking. *Proc R Soc B.* 2001;268(1480):1985–92.
- 584 14. De Graaf ML, Hubert J, Houdijk H, Bruijn SM. Influence of arm swing on cost of transport  
585 during walking. *Biol Open.* 2019;8(6).
- 586 15. Ortega JD, Fehlman LA, Farley CT. Effects of aging and arm swing on the metabolic cost  
587 of stability in human walking. *Journal of biomechanics*, 41(16), 3303-3308. *J Biomech.*  
588 2008;41(16):3303–8.
- 589 16. Abram SJ, Selinger JC, Donelan JM. Energy optimization is a major objective in the real-  
590 time control of step width in human walking. *J Biomech.* 2019;91:85–91.
- 591 17. Roemmich RT, Leech KA, Gonzalez AJ, Bastian AJ. Trading symmetry for energy cost  
592 during walking in healthy adults and persons poststroke. *Neurorehabil Neural Repair.*  
593 2019;33(8):602–13.
- 594 18. Wang WJ, Crompton RH, Li Y, Gunther MM. Energy transformation during erect and 'bent-  
595 hip, bent-knee' walking by humans with implications for the evolution of bipedalism. *J Hum*  
596 *Evol.* 2003;44(5):563–79.
- 597 19. Rodman PS, McHenry HM. Bioenergetics and the origin of hominid bipedalism. *Am J Phys*  
598 *Anthropol.* 1980;52(1):103–6.
- 599 20. Hreljac A. Preferred and energetically optimal gait transition speeds in human locomotion.

- 600 Med Sci Sport Exerc. 1993;25(10):1158–62.
- 601 21. Miller RH, Umberger BR, Hamill J, Caldwell GE. Evaluation of the minimum energy  
602 hypothesis and other potential optimality criteria for human running. Proc R Soc B.  
603 2012;279(1733):1498–505.
- 604 22. Ackermann M, van den Bogert AJ. Optimality principles for model-based prediction of  
605 human gait. J Biomech. 2010;43(6):1055–60.
- 606 23. Falisse A, Serrancolí G, Dembia CL, Gillis J, Jonkers I, De Groot F. Rapid predictive  
607 simulations with complex musculoskeletal models suggest that diverse healthy and  
608 pathological human gaits can emerge from similar control strategies. J R Soc Interface.  
609 2019;16(157):20190402.
- 610 24. Veerkamp K, Waterval NFJ, Geijtenbeek T, Carty CP, Lloyd DG, Harlaar J, et al. Evaluating  
611 cost function criteria in predicting healthy gait. J Biomech. 2021;110530.
- 612 25. Gidley AD, Marsh AP, Umberger BR. Performance criteria for generating predictive optimal  
613 control simulations of bicycle pedaling. Comput Methods Biomech Biomed Engin.  
614 2019;22(1):11–20.
- 615 26. Song S, Geyer H. Predictive neuromechanical simulations indicate why walking  
616 performance declines with ageing. J Physiol. 2018;596(7):1199–210.
- 617 27. Silder A, Besier T, Delp SL. Predicting the metabolic cost of incline walking from muscle  
618 activity and walking mechanics. J Biomech. 2012;45(10):1842–9.
- 619 28. Russell DM, Apatoczky DT. Walking at the preferred stride frequency minimizes muscle  
620 activity. Gait Posture. 2016;45:181–6.
- 621 29. Jaramillo J. Are muscles tuned to the preferred stride frequency of walking? University of  
622 Massachusetts Amherst; 2020.
- 623 30. Prilutsky BI, Gregor RJ. Swing-and support-related muscle actions differentially trigger  
624 human walk–run and run–walk transitions. J Exp Biol. 2001;204(13):2277–87.
- 625 31. Stenum J, Choi JT. Neuromuscular effort predicts walk–run transition speed in normal and  
626 adapted human gaits. J Exp Biol. 2016;219(18):2809–13.
- 627 32. Segers V, Lenoir M, Aerts P, De Clercq D. Influence of M. tibialis anterior fatigue on the  
628 walk-to-run and run-to-walk transition in non-steady state locomotion. Gait Posture.  
629 2007;25(4):639–47.
- 630 33. Neptune RR, Hull ML. A theoretical analysis of preferred pedaling rate selection in  
631 endurance cycling. J Biomech. 1999;32(4):409–15.
- 632 34. Marsh AP, Martin PE. The association between cycling experience and preferred and most  
633 economical cadences. Med Sci Sport Exerc. 1993;25(11):1269–74.
- 634 35. Vercruyssen F, Brisswalter J. Which factors determine the freely chosen cadence during  
635 submaximal cycling? J Sci Med Sport. 2010;13(2):225–31.
- 636 36. Rasmussen J, Damsgaard M, Voigt M. Muscle recruitment by the min/max criterion—a  
637 comparative numerical study. J Biomech. 2001;34(3):409–15.
- 638 37. Crowninshield RD, Brand RA. A physiologically based criterion of muscle force prediction  
639 in locomotion. J Biomech. 1981;14(11):793–801.

- 640 38. Redfield R, Hull ML. Prediction of pedal forces in bicycling using optimization methods. *J*  
641 *Biomech.* 1986;19(7):523–40.
- 642 39. Dingwell JB, Marin LC. Kinematic variability and local dynamic stability of upper body  
643 motions when walking at different speeds. *J Biomech.* 2006;39(3):444–52.
- 644 40. McDonald KA, Cusumano JP, Peeling P, Rubenson J. Multi-objective control in human  
645 walking: insight gained through simultaneous degradation of energetic and motor regulation  
646 systems. *J R Soc Interface.* 2019;16(158):20190227.
- 647 41. Stegeman D, Hermens H. Standards for surface electromyography: The European project  
648 Surface EMG for non-invasive assessment of muscles (SENIAM). 2007;
- 649 42. Peronnet F, Massicotte D. Table of nonprotein respiratory quotient: an update. *Can J Sport*  
650 *Sci.* 1991;16(1):23–9.
- 651 43. Kipp S, Byrnes WC, Kram R. Calculating metabolic energy expenditure across a wide range  
652 of exercise intensities: the equation matters. *Appl Physiol Nutr Metab.* 2018;43(6):639–42.
- 653 44. Devaprakash D, Weir GJ, Dunne JJ, Alderson JA, Donnelly CJ. The influence of digital filter  
654 type, amplitude normalisation method, and co-contraction algorithm on clinically relevant  
655 surface electromyography data during clinical movement assessments. *J Electromyogr*  
656 *Kinesiol.* 2016;31:126–35.
- 657 45. Kram R, Taylor CR. Energetics of running: a new perspective. *Nature.* 1990;346(6281):265–  
658 7.
- 659 46. Roberts TJ, Kram R, Weyand PG, Taylor CR. Energetics of bipedal running. I. Metabolic  
660 cost of generating force. *J Exp Biol.* 1998;201(19):2745–51.
- 661 47. Carrier D, Anders C, Schilling N. The musculoskeletal system of humans is not tuned to  
662 maximize the economy of locomotion. *Proc Natl Acad Sci.* 2011;108(46):18631–6.
- 663 48. Handsfield GG, Meyer CH, Hart JM, Abel MF, Blemker SS. Relationships of 35 lower limb  
664 muscles to height and body mass quantified using MRI. *J Biomech.* 2014;47(3):631–8.
- 665 49. Alexander RM. Optimization and gaits in the locomotion of vertebrates. *Physiol Rev.*  
666 1989;69(4):1199–227.
- 667 50. Hunter LC, Hendrix EC, Dean JC. The cost of walking downhill: is the preferred gait  
668 energetically optimal? *J Biomech.* 2010;43(10):1910–5.
- 669 51. Rosenbaum DA, Gong L, Potts CA. Pre-crastination: hastening subgoal completion at the  
670 expense of extra physical effort. *Psychol Sci.* 2014;25(7):1487–96.
- 671 52. Kistemaker DA, Wong JD, Gribble PL. The central nervous system does not minimize  
672 energy cost in arm movements. *J Neurophysiol.* 2010;104(6):2985–94.
- 673 53. Westling G, Johansson RS. Factors influencing the force control during precision grip. *Exp*  
674 *Brain Res.* 1984;53(2):277–84.
- 675 54. Balasubramanian R, Howe RD, Matsuoka Y. Task performance is prioritized over energy  
676 reduction. *IEEE Trans Biomed Eng.* 2009;56(5):1310–7.
- 677 55. De Rugy A, Loeb GE, Carroll TJ. Muscle coordination is habitual rather than optimal. *J*  
678 *Neurosci.* 2012;32(21):7384–91.
- 679 56. Yandell MB, Zelik KE. Preferred Barefoot Step Frequency is Influenced by Factors Beyond



- 680 Minimizing Metabolic Rate. *Sci Rep.* 2016;6:23243.
- 681 57. Monsch ED, Franz CO, Dean JC. The effects of gait strategy on metabolic rate and  
682 indicators of stability during downhill walking. *J Biomech.* 2012;45(11):1928–33.
- 683 58. Finley JM, Bastian AJ, Gottschall JS. Learning to be economical: the energy cost of walking  
684 tracks motor adaptation. *J Physiol.* 2013;591(4):1081–95.
- 685 59. Huang HJ, Ahmed AA. Older adults learn less, but still reduce metabolic cost, during motor  
686 adaptation. *J Neurophysiol.* 2014;111(1):135–44.
- 687 60. Whiting CS, Allen SP, Brill JW, Kram R. Steep (30°) uphill walking vs. running: COM  
688 movements, stride kinematics, and leg muscle excitations. *Eur J Appl Physiol.*  
689 2020;120(10):2147–57.
- 690 61. Pontzer H. Economy and endurance in human evolution. *Curr Biol.* 2017;27(12):R613-21.
- 691 62. Bramble DM, Lieberman DE. Endurance running and the evolution of Homo. *Nature.*  
692 2004;432(7015):345–52.
- 693 63. Noakes TDO. Fatigue is a brain-derived emotion that regulates the exercise behavior to  
694 ensure the protection of whole body homeostasis. *Front Physiol.* 2012;3:82.
- 695 64. Proske U, Allen T. The neural basis of the senses of effort, force and heaviness. *Exp Brain*  
696 *Res.* 2019;237(3):589–99.
- 697 65. Monjo F, Terrier R, Forestier N. Muscle fatigue as an investigative tool in motor control: A  
698 review with new insights on internal models and posture–movement coordination. *Hum Mov*  
699 *Sci.* 2015;44:225–33.
- 700 66. Wong JD, O’Connor SM, Selinger JC, Donelan JM. Contribution of blood oxygen and carbon  
701 dioxide sensing to the energetic optimization of human walking. *J Neurophysiol.*  
702 2017;118(2):1425–33.
- 703 67. Woledge RC, Curtin NA, Homsher E. Energetic aspects of muscle contraction. *Monogr*  
704 *Physiol Soc.* 1985;41:1–357.
- 705 68. Umberger BR, Gerritsen KG, Martin PE. A model of human muscle energy expenditure.  
706 *Comput Methods Biomech Biomed Engin.* 2003;6(2):99–111.
- 707 69. Beck ON, Punith LK, Nuckols RW, Sawicki GS. Exoskeletons improve locomotion economy  
708 by reducing active muscle volume. *Exerc Sport Sci Rev.* 2019;47(4):237–45.
- 709 70. Roberts TJ, Marsh RL, Weyand PG, Taylor CR. Muscular force in running turkeys: the  
710 economy of minimizing work. *Science (80- ).* 1997;275(5303):1113–5.
- 711 71. Luu BL, Smith JL, Martin PG, McBain RA, Taylor JL, Butler JE. Feedforward consequences  
712 of isometric contractions: effort and ventilation. *Physiol Rep.* 2016;4(15):e12882.
- 713 72. Berniker M, Kording K. Estimating the sources of motor errors for adaptation and  
714 generalization. *Nat Neurosci.* 2008;11(12):1454–61.
- 715 73. Xiang Y, Arora JS, Abdel-Malek K. Physics-based modeling and simulation of human  
716 walking: a review of optimization-based and other approaches. *Struct Multidiscip Optim.*  
717 2010;42(1):1–23.
- 718 74. Taylor JL, Amann M, Duchateau J, Meeusen R, Rice CL. Neural contributions to muscle  
719 fatigue: from the brain to the muscle and back again. *Med Sci Sport Exerc.*

720            2016;48(11):2294.

721

722 **Figures and tables**

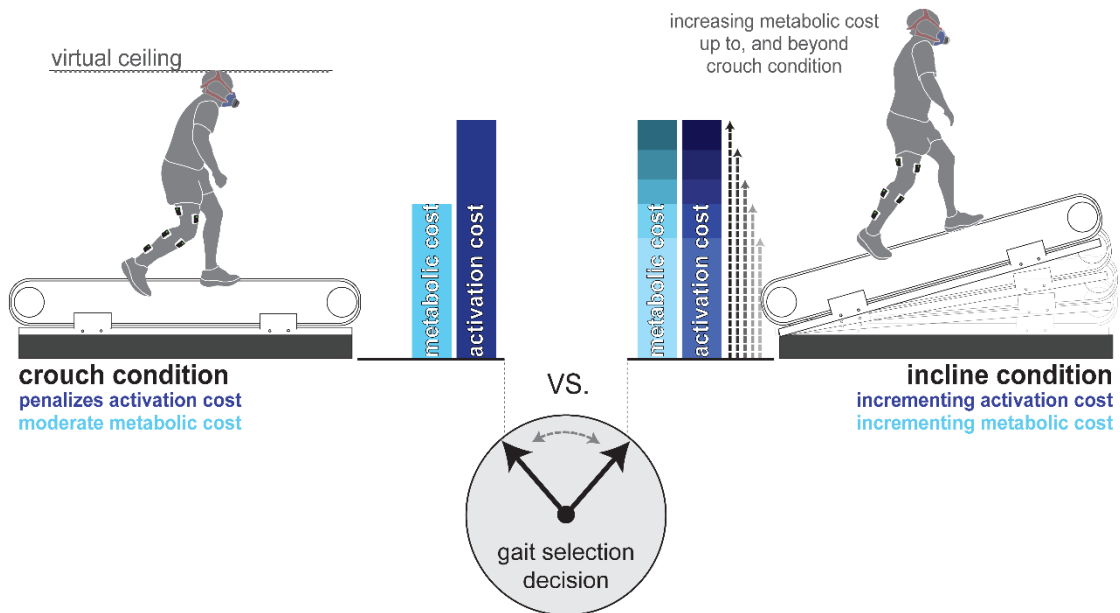

724 **Figure 1.** Experimental design. Participants were asked to select between crouch walking, which  
725 moderately affects metabolic cost and penalizes activation cost, and a series of incline levels that  
726 incrementally increase both metabolic and activation costs. Competing-Cost-Pairs were  
727 established when participants walked on an incline level that incurred a higher metabolic cost but  
728 provided an activation cost advantage relative to the crouch condition. A virtual ceiling and the  
729 participant's silhouette, displayed on a screen anterior to the treadmill, provided feedback regarding  
730 crouch walking task performance.

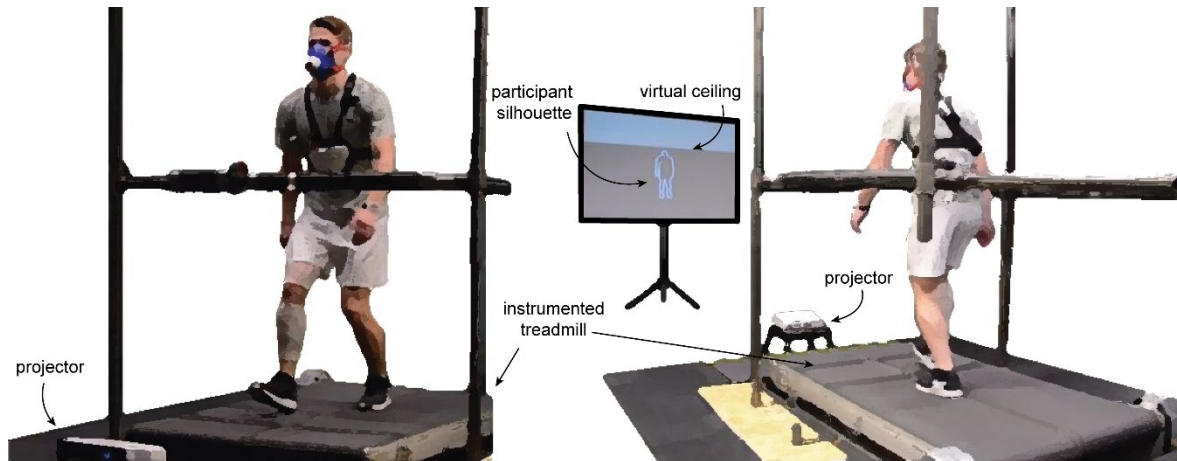

731  
732  
733  
734  
735  
736  
737

**Figure 2.** Experimental setup for crouch walking. Participants walked on a split-belt treadmill with their silhouette projected onto an anteriorly placed screen. Their objective was to avoid collisions between their silhouette and a virtual ceiling, which was set to 93% of their standing height. Real-time motion-tracking and visual feedback was implemented in a custom program developed with the openFrameworks open-source C++ toolkit, using data from a motion sensing device (Xbox Kinect, Microsoft, WA, USA), situated behind the participant.

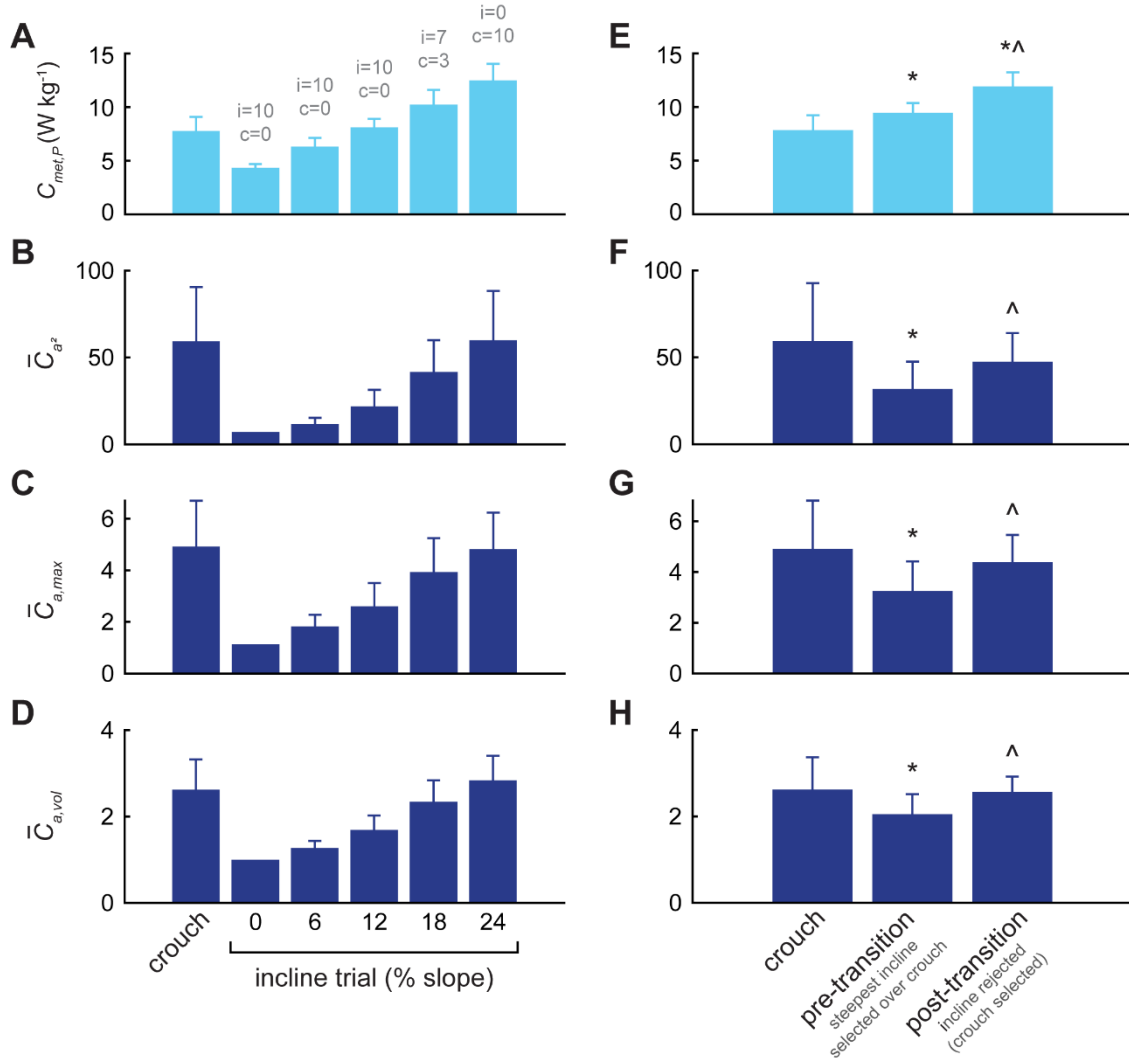

739 **Figure 3.** Walking data for the (A-D) mean ( $\pm$ SD) crouch trial versus five levels of incline (from 0-  
740 24%) and (E-H) mean ( $\pm$ SD) crouch trial versus pre- and post-transition inclines. (A, E) Metabolic  
741 power ( $C_{met,P}$ ;  $W\ kg^{-1}$ ;  $N=10$ ), (B, F) sum of seven lower limb muscles' normalized activations  
742 squared ( $\bar{C}_{a^2}$ ; unitless;  $N=8$ ), (C, G) maximum activation value from seven lower limb muscles'  
743 normalized activation ( $\bar{C}_{a,max}$ ; unitless;  $N=8$ ), and (D, H) sum of the seven lower limb muscles'  
744 volume-weighted activations ( $\bar{C}_{a,vol}$ ; unitless;  $N=8$ ). The number of participants that selected incline  
745 (i) or crouch (c) in each condition are indicated in (A) (grey text).

746 \*Significantly different ( $p<0.017$ ) from crouch (E-H only); ^Significantly different ( $p<0.017$ ) from pre-  
747 transition (E-H only).

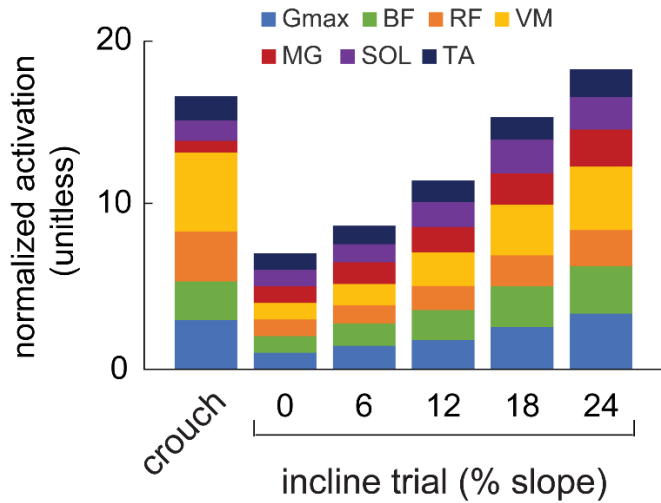

749 **Figure 4** Average ( $N=8$ ) normalized activation costs ( $A_{ij}$ ) during crouch walking (level treadmill)  
750 and incline walking on treadmill slopes of 0-24%. Seven lower limb muscles were analyzed; gluteus  
751 maximus (Gmax), biceps femoris (BF), rectus femoris (RF), vastus medialis (VM), medial  
752 gastrocneimus (MG), soleus (SOL) and tibialis anterior (TA). The unitless quantity  $A_{ij}$  was  
753 established by integrating the linear envelope (activation integral ( $a_{ij}$ )), expressing this as a rate  
754  $\left(\frac{a_{ij}}{T_j}\right)$  and normalizing data for each muscle to the average value obtained from the 0% incline trial.

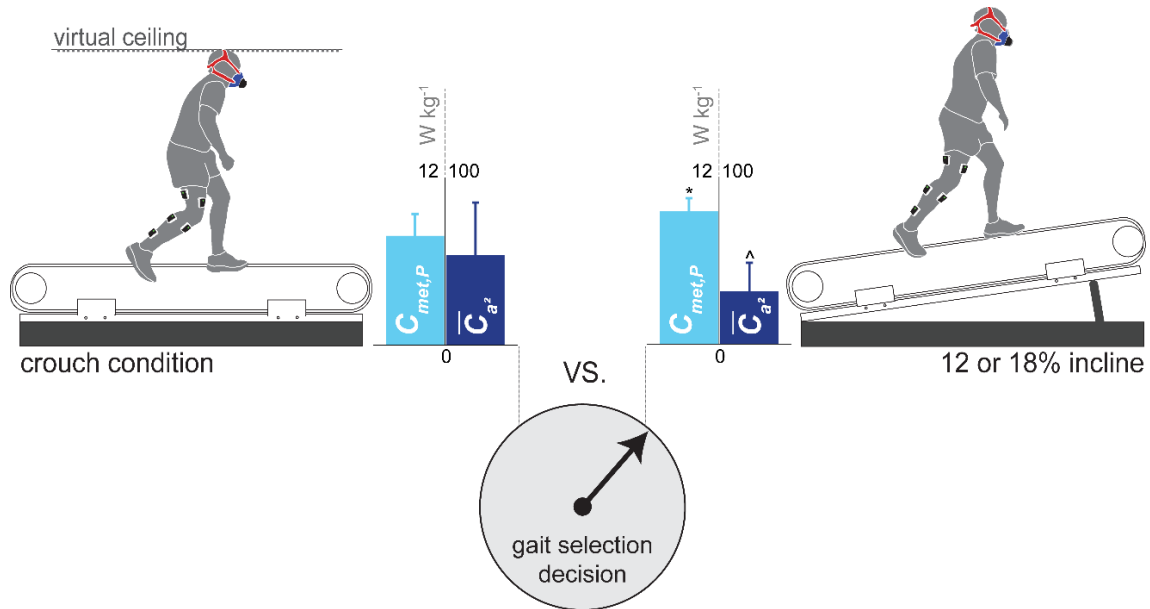

756 **Figure 5.** Competing-Cost-Pairs were established for seven of the eight participants for which this  
757 was feasible. All seven participants selected the incline condition that favored the sum of activations  
758 squared ( $\bar{C}_{a^2}$ ) and penalized metabolic power ( $C_{met,P}$ ). In doing this, they rejected the crouch  
759 walking condition that favored metabolic power and penalized the sum of the activations squared.  
760 Data is presented as the mean $\pm$ SD.

761 \*Significantly different ( $p < 0.05$ ) from crouch  $C_{met,P}$ ; ^Significantly different ( $p < 0.05$ ) from crouch  $\bar{C}_{a^2}$ .

762

763 **Table 1.** Competing-Cost-Pairs (CCP) were established for seven of the eight participants for which this was feasible. The presence of a Competing-  
764 Cost-Pair was determined by comparing the mean crouch and pre-transition incline's percentage change from upright (normal) walking on a 0%  
765 incline for: i) metabolic power ( $C_{met,P}$ ) and the sum of activations squared ( $\bar{C}_{a^2}$ ), ii)  $C_{met,P}$  and the maximal muscle activation ( $\bar{C}_{a,max}$ ), and iii)  $C_{met,P}$   
766 and the sum of the volume-weighted activations ( $\bar{C}_{a,vol}$ ). The pre-transition incline is defined as the steepest incline that was selected over crouch.

| Participant ID | $C_{met,P}^*$<br>% |                        | $\bar{C}_{a^2}^*$<br>% |                        |                  | $\bar{C}_{a,max}^*$<br>% |                        |                  | $\bar{C}_{a,vol}^*$<br>% |                        |                  |
|----------------|--------------------|------------------------|------------------------|------------------------|------------------|--------------------------|------------------------|------------------|--------------------------|------------------------|------------------|
|                | Crouch             | Pre-transition incline | Crouch                 | Pre-transition incline | CCP established? | Crouch                   | Pre-transition incline | CCP established? | Crouch                   | Pre-transition incline | CCP established? |
| 1              | 172.5              | 189.5                  | 566.0                  | 290.8                  | Y                | 292.2                    | 196.8                  | Y                | 167.1                    | 125.7                  | Y                |
| 2              | 226.4              | 236.3                  | 1382.3                 | 794.3                  | Y                | 575.9                    | 399.7                  | Y                | 308.1                    | 236.9                  | Y                |
| 3              | 229.9              | 266.9                  | 1410.1                 | 799.4                  | Y                | 533.8                    | 463.1                  | Y                | 222.5                    | 161.4                  | Y                |
| 4              | 137.6              | 182.5                  | 605.2                  | 373.1                  | Y                | 429.4                    | 227.2                  | Y                | 169.5                    | 155.9                  | Y                |
| 5              | 170.9              | 200.6                  | NA                     | NA                     | -                | NA                       | NA                     | -                | NA                       | NA                     | -                |
| 6              | 204.9              | 202.5                  | 1409.4                 | 454.2                  | N                | 747.6                    | 368.4                  | N                | 239.7                    | 154.4                  | N                |
| 7              | 174.6              | 245.6                  | NA                     | NA                     | -                | NA                       | NA                     | -                | NA                       | NA                     | -                |
| 8              | 137.6              | 199.3                  | 284.4                  | 211.4                  | Y                | 219.5                    | 165.6                  | Y                | 166.9                    | 143.4                  | Y                |
| 9              | 169.6              | 215.9                  | 584.3                  | 308.0                  | Y                | 380.7                    | 249.3                  | Y                | 198.8                    | 156.8                  | Y                |
| 10             | 160.1              | 217.0                  | 469.2                  | 359.1                  | Y                | 297.3                    | 233.9                  | Y                | 167.2                    | 154.2                  | Y                |

767 \*Significant difference ( $p < 0.05$ ) between the crouch and pre-transition incline trials for participants with a CCP ( $N=7$ ).



768 **Supplementary material**

769 **Table S1.** Competing-Cost-Pairs (CCP;  $N=7$ ) and whole-group ( $C_{met,P}$ :  $N=10$ ;  $\bar{C}_{a^2}$ :  $N=8$ ;  $\bar{C}_{a,max}$ :  $N=8$ ;  $\bar{C}_{a,vol}$ :  $N=8$ ) statistical analyses using the  
 770 mean crouch, initial crouch, and final crouch data. The pre-transition incline is defined as the steepest incline that was selected over crouch, whereas  
 771 the post-transition incline is the first rejected incline in favor of crouch.  
 772

|                       |                                                    | $C_{met,P}$   |               | $\bar{C}_{a^2}$   |                   | $\bar{C}_{a,max}$ |               | $\bar{C}_{a,vol}$ |               |
|-----------------------|----------------------------------------------------|---------------|---------------|-------------------|-------------------|-------------------|---------------|-------------------|---------------|
|                       |                                                    | CCP           | Group         | CCP               | Group             | CCP               | Group         | CCP               | Group         |
| <b>Mean crouch</b>    | <i>Distribution</i>                                | <i>Normal</i> | <i>Normal</i> | <i>Non-normal</i> | <i>Non-normal</i> | <i>Normal</i>     | <i>Normal</i> | <i>Normal</i>     | <i>Normal</i> |
|                       | Main effect                                        | -             | <0.001*       | -                 | 0.008*            | -                 | 0.001*        | -                 | 0.003*        |
|                       | Crouch vs. pre-transition incline                  | 0.002*        | 0.007*        | 0.018*            | 0.012*            | 0.003*            | 0.006*        | 0.007*            | 0.003*        |
|                       | Crouch vs. post-transition incline                 | -             | 0.005*        | -                 | 0.263             | -                 | 0.214         | -                 | 0.779         |
|                       | Pre-transition incline vs. post-transition incline | -             | 0.005*        | -                 | 0.017*            | -                 | 0.003*        | -                 | 0.002*        |
|                       | <i>p-value</i>                                     |               |               |                   |                   |                   |               |                   |               |
| <b>Initial crouch</b> | <i>Distribution</i>                                | <i>Normal</i> | <i>Normal</i> | <i>Non-normal</i> | <i>Non-normal</i> | <i>Normal</i>     | <i>Normal</i> | <i>Normal</i>     | <i>Normal</i> |
|                       | Main effect                                        | -             | <0.001*       | -                 | 0.003*            | -                 | 0.002*        | -                 | 0.002*        |
|                       | Crouch vs. pre-transition                          | 0.002*        | 0.007*        | 0.018*            | 0.008*            | 0.003*            | 0.008*        | 0.008*            | 0.003*        |
|                       | Crouch vs. post-transition                         | -             | 0.005*        | -                 | 0.071             | -                 | 0.117         | -                 | 0.329         |
|                       | Pre-transition incline vs. post-transition incline | -             | 0.005*        | -                 | 0.011*            | -                 | 0.003*        | -                 | 0.002*        |
|                       | <i>p-value</i>                                     |               |               |                   |                   |                   |               |                   |               |
| <b>Final crouch</b>   | <i>Distribution</i>                                | <i>Normal</i> | <i>Normal</i> | <i>Non-normal</i> | <i>Non-normal</i> | <i>Normal</i>     | <i>Normal</i> | <i>Normal</i>     | <i>Normal</i> |
|                       | Main effect                                        | -             | <0.001*       | -                 | 0.013*            | -                 | 0.001*        | -                 | 0.002*        |
|                       | Crouch vs. pre-transition                          | 0.002*        | 0.005*        | 0.018*            | 0.013*            | 0.004*            | 0.005*        | 0.009*            | 0.005*        |
|                       | Crouch vs. post-transition                         | -             | 0.005*        | -                 | 0.698             | -                 | 0.513         | -                 | 0.453         |
|                       | Pre-transition incline vs. post-transition incline | -             | 0.005*        | -                 | 0.011*            | -                 | 0.003*        | -                 | 0.002*        |
|                       | <i>p-value</i>                                     |               |               |                   |                   |                   |               |                   |               |

773 \*Significant difference ( $p < 0.05$  for CCP;  $p < 0.05$  for whole-group main effect;  $p < 0.017$  for whole-group *post hoc* test comparisons).
